# Supplementary material for: Evaluation of the Effects of Heteroaryl Ethylene Molecules in Combination with Antibiotics: A Preliminary Study on Control Strains
Source: MDPI journal article supplement (doi:10.3390/antibiotics12081308), 2023-08-10
Supplement: s1 [file s1]

# Evaluation of Synergistic Effect of Heteroaryl Ethylene Molecules in Combination with Antibiotics: A Preliminary Study on Control Strains

Carmelo Bonomo <sup>1,†</sup>, Paolo Giuseppe Bonacci <sup>1,†</sup>, Dalida Angela Bivona <sup>1</sup>, Alessia Mirabile<sup>1</sup>, Dafne Bongiorno <sup>1,\*</sup>, Emanuele Nicitra <sup>1</sup>, Andrea Marino <sup>2</sup>, Carmela Bonaccorso <sup>3,\*</sup>, Giuseppe Consiglio <sup>3</sup>, Cosimo Gianluca Fortuna <sup>3</sup>, Stefania Stefani <sup>1</sup> and Nicolò Musso <sup>1</sup>

<sup>1</sup> Department of Biomedical and Biotechnological Sciences (BIOMETEC), Università degli Studi di Catania, Via S. Sofia, 89, 95123 Catania, Italy. carmelo.bonomo@phd.unict.it (C.B.); paolo.bonaccorsi@phd.unict.it (P.G.B.); dalida.bivona@phd.unict.it (D.A.B.); alessiamirabile93@gmail.com (A.M.); dbongio@unict.it (D.B.); emanuelenicitra@gmail.com (E.N.); stefanis@unict.it (S.S.); nmusso@unict.it (N.M.).

<sup>2</sup> Unit of Infectious Diseases, Department of Clinical and Experimental Medicine, ARNAS Garibaldi Hospital, Università degli Studi di Catania, Via Palermo, 95122 Catania, Italy. andreamarino9103@gmail.com (A. Ma.).

<sup>3</sup> Department of Chemical Sciences, Università degli Studi di Catania, Viale Andrea Doria 6, 95125 Catania, Italy. carmela.bonaccorso@unict.it (C. Bona.); giuseppe.consiglio@unict.it (G.C.); cg.fortuna@unict.it (C.G.F.).

\* Correspondence: dbongio@unict.it (Microbiology Section), +393921210540; carmela.bonaccorso@unict.it (Chemistry Section), +393284723158-

† These authors contributed equally

## Table of contents

|                                                                                                                                                                                                                                                           |            |
|-----------------------------------------------------------------------------------------------------------------------------------------------------------------------------------------------------------------------------------------------------------|------------|
| <b>Table S1.</b> Structures of the 13 compounds added to the QSAR model for antimicrobial activity against <i>S. aureus</i> ATCC29213                                                                                                                     | <b>S2</b>  |
| <b>Figure S1.</b> Score plot of Principal Component Analysis (PCA) at the third component (PC1 vs PC2 vs PC3) for the 49 heteroaromatic compounds tested for antimicrobial activity against <i>S. aureus</i> ATCC29213.                                   | <b>S4</b>  |
| <b>Figure S2.</b> Plot of the coefficient of determination $R^2$ and cross-validated coefficient of determination (leave-one-out, LOO) $Q^2$ vs. the number of LVs of the PLS models for antimicrobial activity against <i>S. aureus</i> ATCC29213.       | <b>S4</b>  |
| <b>Figure S3.</b> Plot of the Variable Influence on Projection VIP of the PLS models for antimicrobial activity against <i>S. aureus</i> ATCC29213.                                                                                                       | <b>S5</b>  |
| <b>Figure S4.</b> Plot of the Weights for VS+ descriptors at the third latent variable (LV1 vs LV2 vs LV3) of the PLS models for antimicrobial activity against <i>S. aureus</i> ATCC29213.                                                               | <b>S5</b>  |
| <b>Table S2.</b> Structures of the 38 heteroaryl ethylene compounds of the QSAR model for cytotoxic activity towards CaCo2 colon-rectal cancer cell line                                                                                                  | <b>S6</b>  |
| <b>Figure S5.</b> Score plot of Principal Component Analysis (PCA) at the third component (PC1 vs PC2 vs PC3) for the 38 Heteroaromatic compounds tested for cytotoxic activity towards CaCo2 colon-rectal cancer cell line.                              | <b>S12</b> |
| <b>Figure S6.</b> Plot of the coefficient of determination $R^2$ and cross-validated coefficient of determination (leave-one-out, LOO) $Q^2$ vs. the number of LVs of the PLS models for cytotoxic activity towards CaCo-2 colon-rectal cancer cell line. | <b>S12</b> |
| <b>Figure S7.</b> Plot of the Variable Influence on Projection VIP of the PLS models for cytotoxic activity towards CaCo-2 colon-rectal cancer cell line.                                                                                                 | <b>S13</b> |
| <b>Figure S8.</b> Plot of the Weights for VS+ descriptors at the third latent variable (LV1 vs LV2 vs LV3) of the PLS models for cytotoxic activity towards CaCo-2 colon-rectal cancer cell line.                                                         | <b>S13</b> |
| <b>Table S3.</b> Dunnett's multiple comparisons test performed for all combinations.                                                                                                                                                                      | <b>S14</b> |

**Table S1.** Structures of the 13 compounds added to the QSAR model for antimicrobial activity against *S. aureus* ATCC29213 [9].

| Molecules & Smiles string                                                                                                                                     | ID VS+ | MIC<br>( $\mu\text{g/mL}$ ) | [Ref] |
|---------------------------------------------------------------------------------------------------------------------------------------------------------------|--------|-----------------------------|-------|
| 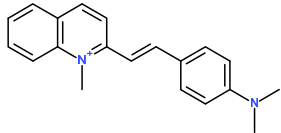<br><chem>CN(C)c1ccc(\C=C\c2ccc3ccccc3[n+](C)cc2)cc1</chem>                  | PB1    | 4                           | [9]   |
| <br><chem>CCCCN(CCCC)c1ccc(s1)c2ccc(\C=C\c3ccc4ccccc4[n+](C)cc3)s2</chem>    | PB2    | 4                           |       |
| <br><chem>C[n+](C)c1ccc(\C=C\c2ccc(s2)c3ccccc3)ccc4ccccc14</chem>            | PB3    | 4                           |       |
| <br><chem>CN(C)c1ccc(\C=C\c2ccc(\C=C\c3ccc(cc3)N(C)C)[n+](C)cc2)cc1</chem> | PB4    | 0.25                        |       |
| <br><chem>Clc1ccc(Cl)c(c1)c2oc(\C=C\c3cc[n+](C)cc3)c4ncccn4)cc2</chem>     | PB5    | 1                           |       |
| <br><chem>C[n+](C)c1ccc(\C=C\c2oc(cc2)c3cc(Cl)ccc3Cl)cc1</chem>            | PB6    | 4                           |       |
| <br><chem>CC[n+](C)c1ccc2\C(=C\c3oc(cc3)c4ccc(Cl)cc4)\CCCc2c1</chem>       | PB7    | 4                           |       |

Table S1. Continued

|                                                                                                                                                           |               |      |                     |
|-----------------------------------------------------------------------------------------------------------------------------------------------------------|---------------|------|---------------------|
| 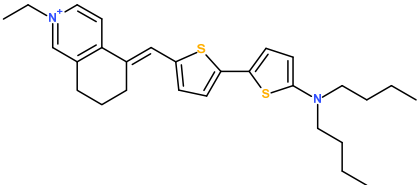<br><chem>CCCCN(CCCC)c1ccc(s1)c2ccc(\C=C\3/CCCc4c[n+](CC)ccc34)s2</chem> | <b>PB8</b>    | 2    | [9]                 |
| <br><chem>CC[n+]1ccc2\C(=C\c3ccccc3O)\CCCc2c1</chem>                     | <b>BCNAc1</b> | >128 | Unpublished results |
| <br><chem>CC[n+]1ccc2\C(=C\c3ccc(cc3)N(C)C)\CCCc2c1</chem>               | <b>BCM3</b>   | 64   |                     |
| <br><chem>C[n+]1c(\C=C\c2cc(Cl)ccc2O)cccc1\C=C\c3cc(Cl)ccc3O</chem>      | <b>BCM12</b>  | >128 |                     |
| <br><chem>CC[n+]1c(\C=C\c2cn(CC)c3ccccc23)ccc4ccccc14</chem>           | <b>SQL</b>    | 4    | [22]                |
| <br><chem>CC[n+]1c(\C=C\c2cn(CC)c3ccccc23)sc4ccccc14</chem>            | <b>SBT</b>    | 1    |                     |

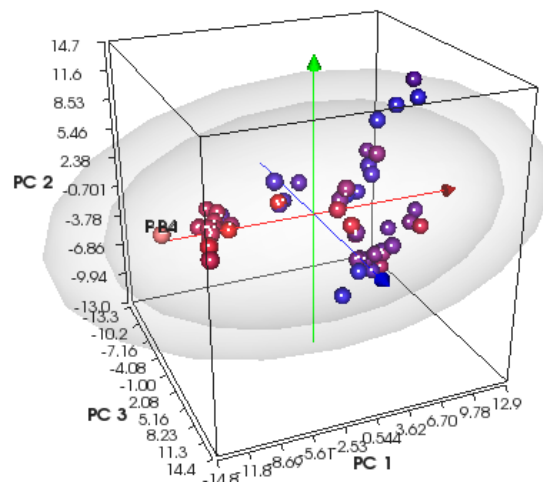

**Figure S1.** Score plot of Principal Component Analysis (PCA) at the third component (PC1 vs PC2 vs PC3) for the 49 Heteroaromatic compounds tested for antimicrobial activity against *S. aureus* ATCC29213. Compounds are color-coded by their activity values, using a scale from red (actives) to blue (inactives), according to the experimental MIC values.

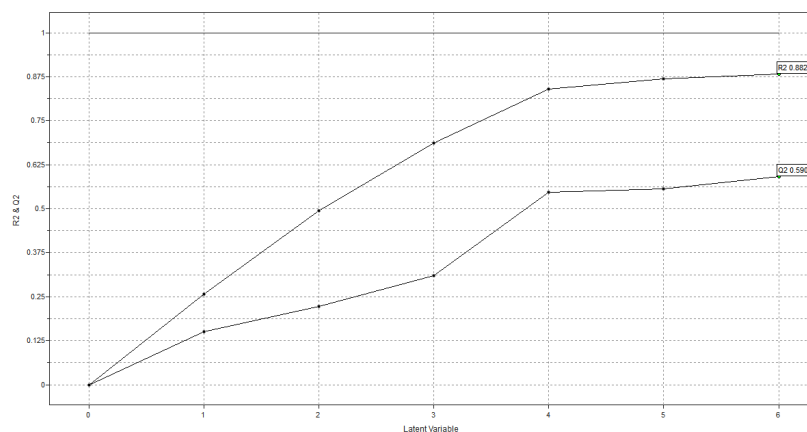

**Figure S2.** Plot of the coefficient of determination  $R^2$  and cross-validated coefficient of determination (leave-one-out, LOO)  $Q^2$  vs. the number of LVs of the PLS models for antimicrobial activity against *S. aureus* ATCC29213.

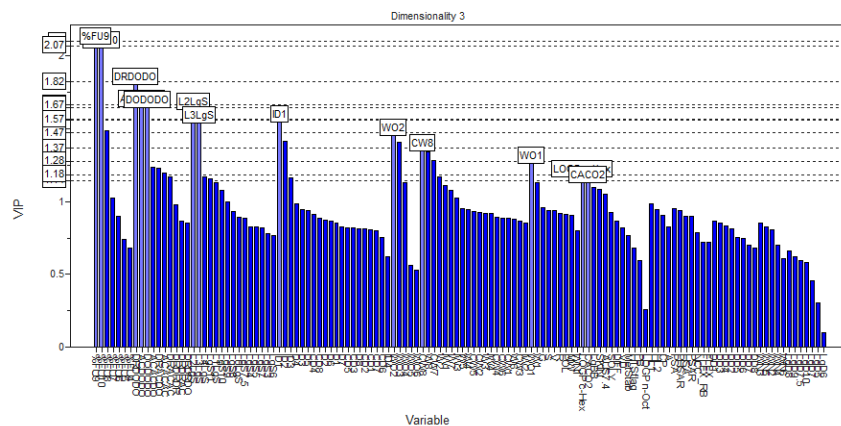

**Figure S3.** Plot of the Variable Influence on Projection VIP of the PLS models for antimicrobial activity against *S. aureus* ATCC29213.

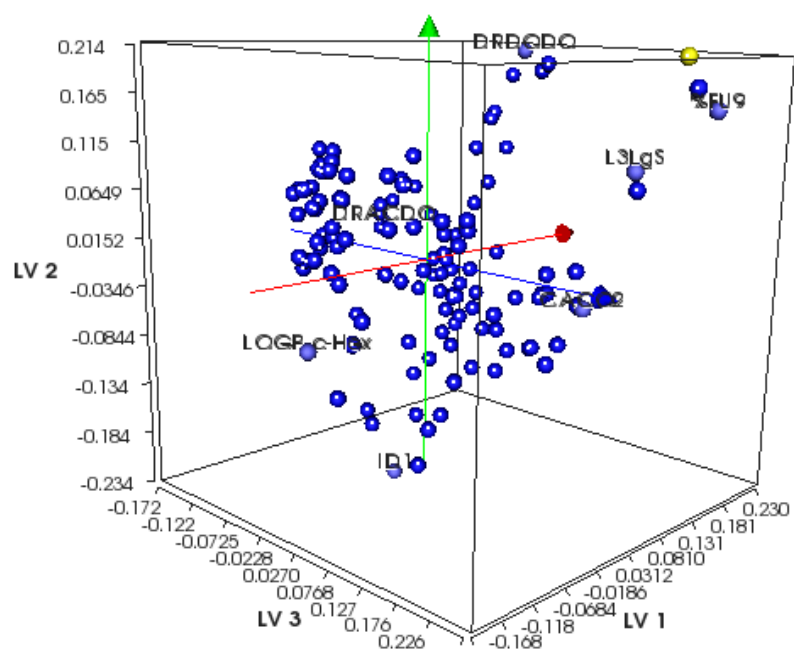

**Figure S4.** Plot of the Weights for VS+ descriptors at the third latent variable (LV1 vs LV2 vs LV3) of the PLS models for antimicrobial activity against *S. aureus* ATCC29213. The yellow circle represents the dependent variable (MIC).

**Table S2.** Structures of the 38 heteroaryl ethylene compounds of the QSAR model for cytotoxic activity towards CaCo2 colon-rectal cancer cell line

| Molecules & Smiles string                                                                                                                             | ID VS+ | IC <sub>50</sub><br>48h | Log(IC <sub>50</sub> )<br>48h |
|-------------------------------------------------------------------------------------------------------------------------------------------------------|--------|-------------------------|-------------------------------|
| 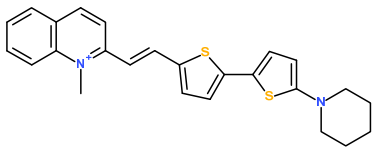<br><chem>C[n+]1c(\C=C\c2ccc(s2)c3ccc(s3)N4CCCCC4)ccc5ccccc15</chem> | BC1    | 20                      | 1.30                          |
| <br><chem>N#CC(=Cc1ccc(s1)c2ccc(s2)N3CCCCC3)C#N</chem>               | BC2    | 100                     | 2                             |
| <br><chem>CCOC(=O)C(=C\c1ccc(s1)c2ccc(s2)N3CCCCC3)\C#N</chem>        | BC3    | 250                     | 2.40                          |
| <br><chem>OC(=O)C(=C\c1ccc(s1)c2ccc(s2)N3CCCCC3)\C#N</chem>         | BC4    | 250                     | 2.40                          |
| <br><chem>C[n+]1ccccc1\C=C\c2ccc(cc2)c3cnnc3</chem>                | BC5    | 100                     | 2                             |
| <br><chem>C[n+]1c(\C=C\c2ccc(cc2)c3cnnc3)ccc4ccccc14</chem>        | BC6    | 25                      | 1.5                           |

Table S2. Continued

|                                                                                                                                                            |          |       |         |
|------------------------------------------------------------------------------------------------------------------------------------------------------------|----------|-------|---------|
| 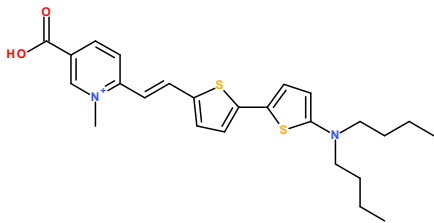<br><chem>CCCCN(CCCC)c1ccc(s1)c2ccc(\C=C\c3ccc(c[n+]3C)C(=O)O)s2</chem>   | BCG3     | 8     | 0.90    |
| <br><chem>CC[n+]1ccc2\C(=C\c3ccc(cc3)N(C)C)\CCCc2c1</chem>                | BCM3     | 1.35  | 0.13    |
| <br><chem>COc1ccc(\C=C\c2ccc(\C=C\c3ccc(OC)cc3)[n+]2C)cc1</chem>          | BCM6     | 12.34 | 1.09    |
| <br><chem>C[n+]1c(\C=C\c2cc(Cl)ccc2O)cccc1\C=C\c3cc(Cl)ccc3O</chem>      | BCM12    | 250   | 2.40    |
| <br><chem>COc1cc(\C=C\c2ccc[n+]2C)cc(OC)c1OC</chem>                     | GC VI 2  | 250   | 2.40    |
| <br><chem>C[n+]1cccc1\C=C\c2ccc3ccc4CC=CC5C=Cc2c3c45</chem>             | GC VI 3  | 0.9   | -0.0458 |
| <br><chem>C[n+]1c(\C=C\c2ccc(cc2)N(c3ccccc3)c4ccccc4)ccc5ccccc15</chem> | GC VI 14 | 4     | 0.602   |

Table S2. Continued

|                                                                                                                                                                                   |           |      |       |
|-----------------------------------------------------------------------------------------------------------------------------------------------------------------------------------|-----------|------|-------|
| 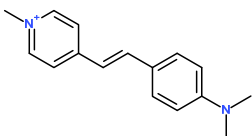<br><chem>CN(C)c1ccc(\C=C\c2cc[n+](C)cc2)cc1</chem>                                              | GC VI 17  | 8    | 0.903 |
| <br><chem>CN(C)c1ccc(\C=C(/C#N)\c2cccc[n+](C)cc2)cc1</chem>                                      | GC VI 26  | 100  | 2     |
| <br><chem>CN(C)c1ccc(\C=C\C=C\c2cc[n+](C)cc2)cc1</chem>                                          | GC VI 45  | 16   | 1.20  |
| <br><chem>C[n+](c1c(\C=C\c2ccnc(c2)c3cc(\C=C\c4ccc5ccccc5[n+](C)ccn3)ccc6ccccc16</chem>          | GC VI 71  | 51.2 | 1.71  |
| <br><chem>CCOC(=O)C[n+](c1ccc(\C=C\c2ccc(C(C#N)C#N)n2C)cc1</chem>                              | GC VII 13 | 100  | 2     |
| <br><chem>CCOC(=O)C(C#N)c1ccc(\C=C\c2cc[n+](C)cc2)n1C</chem>                                   | GC VII 16 | 70   | 1.85  |
| <br><chem>Cn1c(\C=C\c2=C(C#N)C(=C(C#N)C#N)OC2(C)C)ccc1\C=C\c3cc[n+](CC(=O)OC(C)(C)C)cc3</chem> | GC VII 41 | 100  | 2     |



Table S2. Continued

|                                                                                                                                                                     |           |      |        |
|---------------------------------------------------------------------------------------------------------------------------------------------------------------------|-----------|------|--------|
| 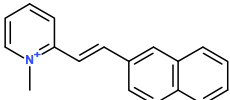<br><chem>C[n+]1cccc1\C=C\c2ccc3ccccc3c2</chem>                                    | GC VII 46 | 5.5  | 0.740  |
| <br><chem>C[n+]1cccc1\C=C\c2ccc(cc2)N(c3ccccc3)c4ccccc4</chem>                     | GC VII 47 | 1    | 0      |
| <br><chem>Cn1c(\C=C\c2=CC=C3C=CC=[N]2C)ccc1\C=C\c4cncnc4</chem>                    | GF I 10   | 20   | 1.30   |
| <br><chem>CN(C)c1ccc(\C=C\C=C\c2cccc[n+]2C)cc1</chem>                              | GF I 25   | 10   | 1      |
| <br><chem>C[n+]1ccc(\C=C\c2ccc(\C=C\c3ccncc3)n2C)cc1</chem>                      | GF I 30   | 50   | 1.70   |
| <br><chem>C[n+]1ccc(\C=C\c2ccc(C=C(C#N)C#N)n2C)cc1</chem>                        | GF I 31   | 100  | 2      |
| <br><chem>C[n+]1ccc(\C=C\c2ccc(\C=C\c3=C(C#N)C(=C(C#N)C#N)OC3(C)C)n2C)cc1</chem> | GF I 32   | 32   | 1.51   |
| <br><chem>CN(C)c1ccc(\C=C\c2ccc3ccccc3[n+]2C)cc1</chem>                          | PB1       | 0.35 | -0.456 |

Table S2. Continued

|                                                                                                                                                             |     |      |        |
|-------------------------------------------------------------------------------------------------------------------------------------------------------------|-----|------|--------|
| 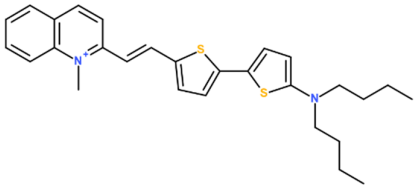<br><chem>CCCCN(CCCC)c1ccc(s1)c2ccc(\C=C\c3ccc4ccccc4[n+]3C)s2</chem>      | PB2 | 0.18 | -0.745 |
| <br><chem>C[n+]1c(\C=C\c2ccc(s2)c3ccccc3)ccc4ccccc14</chem>                | PB3 | 1.3  | 0.114  |
| <br><chem>CN(C)c1ccc(\C=C\c2ccc(\C=C\c3ccc(cc3)N(C)C)[n+]2C)cc1</chem>     | PB4 | 0.33 | -0.481 |
| <br><chem>Clc1ccc(Cl)c(c1)c2oc(\C=C\c3cc[n+](cc3)c4nccn4)cc2</chem>       | PB5 | 0.95 | 0.246  |
| <br><chem>C[n+]1ccc(\C=C\c2oc(cc2)c3cc(Cl)ccc3Cl)cc1</chem>              | PB6 | 3.22 | 0.508  |
| <br><chem>CC[n+]1ccc2\C(=C\c3oc(cc3)c4ccc(Cl)cc4)\CCCc2c1</chem>         | PB7 | 1.36 | 0.134  |
| <br><chem>CCCCN(CCCC)c1ccc(s1)c2ccc(\C=C\3/CCCc4c[n+](CC)ccc34)s2</chem> | PB8 | 5.04 | 0.702  |

Table S2. Continued

|                                                                                                                                                                                                 |      |      |      |
|-------------------------------------------------------------------------------------------------------------------------------------------------------------------------------------------------|------|------|------|
| 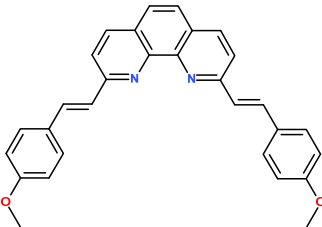<br><chem>COc1ccc(\C=C\c2ccc3ccc4ccc(\C=C\c5ccc(OC)cc5)nc4c3n2)cc1</chem>                                      | PB9  | 250  | 2.40 |
| <br><chem>CN(C)c1ccc(\C=C\c2ccc3ccc4ccc(\C=C\c5ccc(cc5)N(C)C)nc4c3n2)cc1</chem>                                | PB10 | 10.6 | 1.03 |
| <br><chem>C(=C\c1ccc2ccc3ccc(\C=C\c4ccc(cc4)N(c5ccccc5)c6ccccc6)nc3c2n1)/c7ccc(cc7)N(c8ccccc8)c9ccccc9</chem> | PB11 | 11.5 | 1.06 |

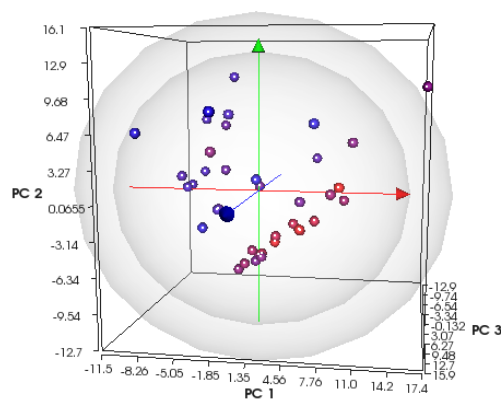

**Figure S5.** Score plot of Principal Component Analysis (PCA) at the third component (PC1 vs PC2 vs PC3) for the 38 heteroaromatic compounds tested for cytotoxic activity towards CaCo2 colon-rectal cancer cell line. Compounds are color-coded by their activity values, using a scale from red (actives) to blue (inactives), according to the experimental MIC values.

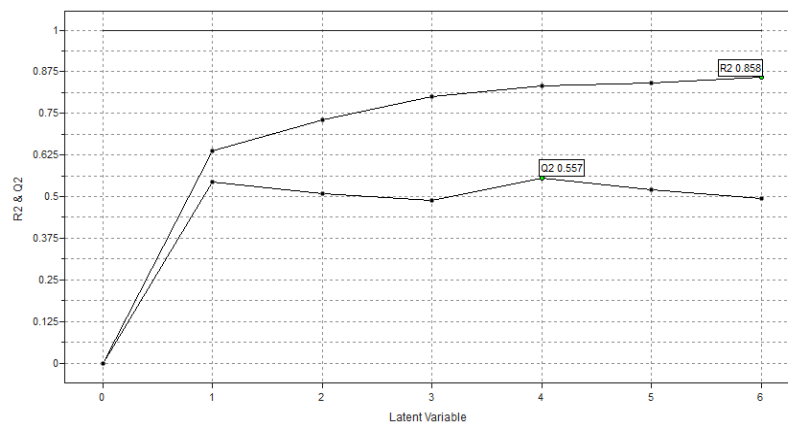

**Figure S6.** Plot of the coefficient of determination  $R^2$  and cross-validated coefficient of determination (leave-one-out, LOO)  $Q^2$  vs. the number of LVs of the PLS models for cytotoxic activity towards CaCo2 colon-rectal cancer cell line.

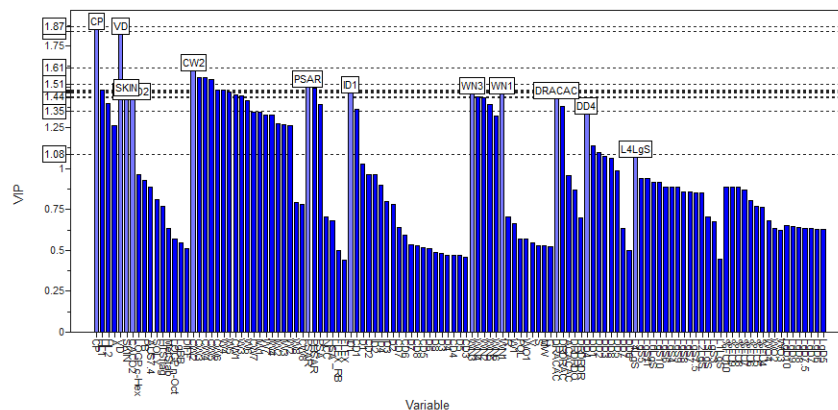

**Figure S7.** Plot of the Variable Influence on Projection VIP of the PLS models for cytotoxic activity towards CaCo2 colon-rectal cancer cell line.

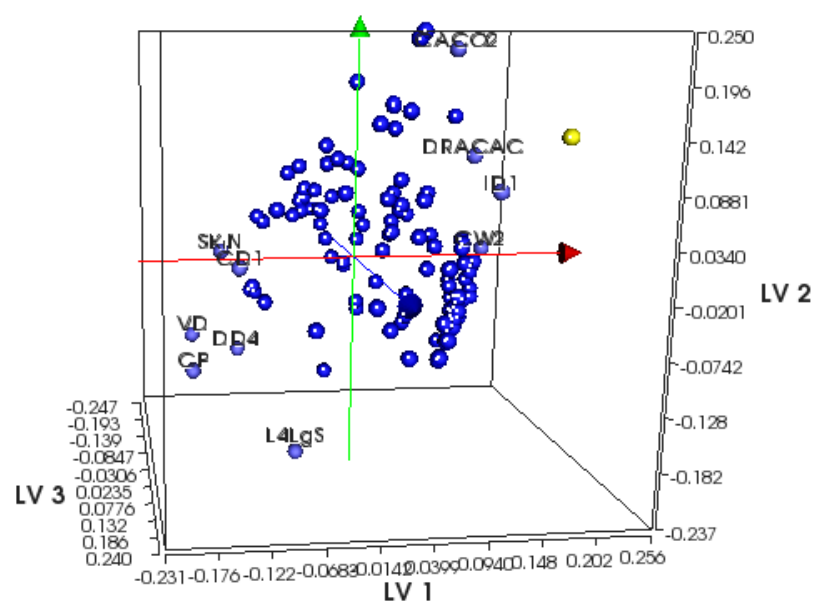

**Figure S8.** Plot of the Weights for VS+ descriptors at the third latent variable (LV1 *vs* LV2 *vs* LV3) of the PLS models for cytotoxic activity towards CaCo2 colon-rectal cancer cell line. The yellow circle represents the dependent variable the logarithm of the IC<sub>50</sub>.

**Table S3.** Dunnett's multiple comparisons test performed for all combinations. \* = P-value  $\leq 0.05$ ; \*\*= P-value  $\leq 0.01$ ; \*\*\*=P-value  $\leq 0.001$ ; \*\*\*\*= P-value $\leq 0.0001$ .

| Dunnett's multiple comparisons test                | Mean Diff | 95% CI of diff   | Below threshold? | Summary | Adjusted P Value |
|----------------------------------------------------|-----------|------------------|------------------|---------|------------------|
| <b>ANTIBIOTICS 24h</b>                             |           |                  |                  |         |                  |
| Untreated vs. T0                                   | 48.44     | 29.50 to 67.39   | Yes              | ****    | <0.0001          |
| Untreated vs. Linezolid MIC                        | -3.090    | -36.67 to 30.49  | No               | ns      | 0.9997           |
| Untreated vs. Linezolid subMIC                     | 7.008     | -26.57 to 40.59  | No               | ns      | 0.9993           |
| Untreated vs. Gentamicin MIC                       | -7.797    | -41.38 to 25.78  | No               | ns      | 0.9992           |
| Untreated vs. Gentamicin subMIC                    | 18.12     | -15.46 to 51.70  | No               | ns      | 0.7346           |
| Untreated vs. Ampicillin MIC                       | 2.723     | -30.86 to 36.30  | No               | ns      | 0.9998           |
| Untreated vs. Ampicillin subMIC                    | -5.167    | -38.75 to 28.41  | No               | ns      | 0.9996           |
| Untreated vs. Erythromycin MIC                     | 2.213     | -31.37 to 35.79  | No               | ns      | 0.9998           |
| Untreated vs. Erythromycin subMIC                  | -9.070    | -42.65 to 24.51  | No               | ns      | 0.9963           |
| Untreated vs. Rifampicin MIC                       | 16.68     | -16.90 to 50.26  | No               | ns      | 0.8188           |
| Untreated vs. Rifampicin subMIC                    | 3.783     | -29.80 to 37.36  | No               | ns      | 0.9997           |
| <b>ANTIBIOTICS + PB4 0.2 <math>\mu</math>M 24h</b> |           |                  |                  |         |                  |
| Untreated vs. T0                                   | 52.99     | 37.65 to 68.32   | Yes              | ****    | <0.0001          |
| Untreated vs. Linezolid MIC                        | 10.99     | -16.19 to 38.17  | No               | ns      | 0.9435           |
| Untreated vs. Linezolid subMIC                     | 22.91     | -4.265 to 50.09  | No               | ns      | 0.1618           |
| Untreated vs. Gentamicin MIC                       | 29.40     | 2.225 to 56.58   | Yes              | *       | 0.0252           |
| Untreated vs. Gentamicin subMIC                    | 22.53     | -4.648 to 49.71  | No               | ns      | 0.1778           |
| Untreated vs. Ampicillin MIC                       | 21.13     | -6.045 to 48.31  | No               | ns      | 0.2471           |
| Untreated vs. Ampicillin subMIC                    | 19.39     | -7.785 to 46.57  | No               | ns      | 0.3570           |
| Untreated vs. Erythromycin MIC                     | 21.39     | -5.793 to 48.56  | No               | ns      | 0.2332           |
| Untreated vs. Erythromycin subMIC                  | 30.08     | 2.905 to 57.26   | Yes              | *       | 0.0202           |
| Untreated vs. Rifampicin MIC                       | 28.09     | 0.9099 to 55.27  | Yes              | *       | 0.0380           |
| Untreated vs. Rifampicin subMIC                    | 24.31     | -2.865 to 51.49  | No               | ns      | 0.1126           |
| <b>ANTIBIOTICS 48h</b>                             |           |                  |                  |         |                  |
| Untreated vs. T0                                   | 136.6     | 104.1 to 169.1   | Yes              | ****    | <0.0001          |
| Untreated vs. Linezolid MIC                        | -14.37    | -71.94 to 43.20  | No               | ns      | 0.9968           |
| Untreated vs. Linezolid subMIC                     | -9.069    | -66.64 to 48.50  | No               | ns      | 0.9995           |
| Untreated vs. Gentamicin MIC                       | -8.939    | -66.51 to 48.63  | No               | ns      | 0.9995           |
| Untreated vs. Gentamicin subMIC                    | -33.12    | -90.69 to 24.45  | No               | ns      | 0.6570           |
| Untreated vs. Ampicillin MIC                       | -82.54    | -140.1 to -24.97 | Yes              | ***     | 0.0008           |
| Untreated vs. Ampicillin subMIC                    | -8.984    | -66.55 to 48.58  | No               | ns      | 0.9995           |
| Untreated vs. Erythromycin MIC                     | -30.40    | -87.97 to 27.16  | No               | ns      | 0.7585           |
| Untreated vs. Erythromycin subMIC                  | -42.07    | -99.64 to 15.50  | No               | ns      | 0.3247           |
| Untreated vs. Rifampicin MIC                       | -44.02    | -101.6 to 13.54  | No               | ns      | 0.2669           |
| Untreated vs. Rifampicin subMIC                    | -27.05    | -84.62 to 30.51  | No               | ns      | 0.8635           |
| <b>ANTIBIOTICS + PB4 0.2 <math>\mu</math>M 48h</b> |           |                  |                  |         |                  |

|                                   |       |                 |     |      |         |
|-----------------------------------|-------|-----------------|-----|------|---------|
| Untreated vs. T0                  | 84.25 | 63.16 to 105.3  | Yes | **** | <0.0001 |
| Untreated vs. Linezolid MIC       | 40.56 | 3.180 to 77.95  | Yes | *    | 0.0245  |
| Untreated vs. Linezolid subMIC    | 55.66 | 18.28 to 93.05  | Yes | ***  | 0.0005  |
| Untreated vs. Gentamicin MIC      | 41.74 | 4.358 to 79.13  | Yes | *    | 0.0186  |
| Untreated vs. Gentamicin subMIC   | 86.73 | 49.35 to 124.1  | Yes | **** | <0.0001 |
| Untreated vs. Ampicillin MIC      | 58.50 | 21.12 to 95.89  | Yes | ***  | 0.0002  |
| Untreated vs. Ampicillin subMIC   | 49.22 | 11.83 to 86.60  | Yes | **   | 0.0028  |
| Untreated vs. Erythromycin MIC    | 70.36 | 32.97 to 107.7  | Yes | **** | <0.0001 |
| Untreated vs. Erythromycin subMIC | 30.43 | -6.955 to 67.81 | No  | ns   | 0.1963  |
| Untreated vs. Rifampicin MIC      | 27.48 | -9.900 to 64.87 | No  | ns   | 0.3169  |
| Untreated vs. Rifampicin subMIC   | 22.49 | -14.89 to 59.88 | No  | ns   | 0.5974  |

**Table S4.** Values obtained from the MTT assay normalised with respect to T0 with their standard deviations.  
AA = arithmetic average ST.DEV.= Standard Deviation.

|        | ANTIBIOTICS 24H                |        |       |        |       |        |       |        |       |        |        | ANTIBIOTICS 48H                |        |       |        |       |        |       |        |       |        |
|--------|--------------------------------|--------|-------|--------|-------|--------|-------|--------|-------|--------|--------|--------------------------------|--------|-------|--------|-------|--------|-------|--------|-------|--------|
|        | UNTREATED                      |        |       |        |       |        |       |        |       |        |        | UNTREATED                      |        |       |        |       |        |       |        |       |        |
| AA     | 127.3                          | 87.0   | 147.8 | 163.7  | 135.4 | 148.6  | 151.9 | 225.0  | 137.3 | 157.8  |        | 186.5                          | 210.6  | 226.7 | 234.7  | 238.4 | 237.0  | 273.3 | 249.8  | 272.0 | 191.0  |
|        | 143.2                          | 46.2   | 138.5 | 142.2  | 210.1 | 161.7  | 193.9 | 154.9  | 125.6 | 156.3  |        | 242.6                          | 273.2  | 208.5 | 169.8  | 240.3 | 443.9  | 205.1 | 290.5  | 245.0 | 241.4  |
|        | 153.7                          | 153.9  | 150.7 | 167.3  | 158.6 | 160.2  | 173.2 | 198.2  | 127.4 | 134.0  |        | 210.2                          | 268.6  | 169.8 | 188.7  | 215.7 | 430.6  | 343.2 | 319.7  | 236.9 | 257.4  |
|        | 120.6                          | 171.7  | 114.7 | 130.0  | 143.2 | 123.4  | 134.4 | 135.1  | 156.8 | 133.7  |        | 227.7                          | 304.6  | 249.4 | 221.3  | 206.3 | 271.8  | 224.6 | 269.4  | 223.1 | 232.8  |
|        | 147.4                          |        |       |        |       |        |       |        |       |        | AA     | 248.8                          |        |       |        |       |        |       |        |       |        |
| ST.DEV | 30.6                           |        |       |        |       |        |       |        |       |        | ST.DEV | 57.7                           |        |       |        |       |        |       |        |       |        |
|        |                                |        |       |        |       |        |       |        |       |        |        |                                |        |       |        |       |        |       |        |       |        |
|        | LIN                            | LIN    | GEN   | GEN    | AMP   | AMP    | ERI   | ERI    | RIF   | RIF    |        | LIN                            | LIN    | GEN   | GEN    | AMP   | AMP    | ERI   | ERI    | RIF   | RIF    |
|        | MIC                            | subMIC | MIC   | subMIC | MIC   | subMIC | MIC   | subMIC | MIC   | subMIC |        | MIC                            | subMIC | MIC   | subMIC | MIC   | subMIC | MIC   | subMIC | MIC   | subMIC |
|        | 157.5                          | 133.4  | 173.7 | 93.3   | 144.7 | 163.1  | 156.1 | 209.7  | 121.5 | 149.3  |        | 182.1                          | 252.1  | 221.1 | 233.3  | 399.9 | 273.3  | 316.1 | 249.4  | 358.2 | 274.7  |
|        | 138.3                          | 142.5  | 162.7 | 138.3  | 152.7 | 141.2  | 163.4 | 151.2  | 144.4 | 150.0  |        | 264.2                          | 283.5  | 224.6 | 275.4  | 275.7 | 237.4  | 253.0 | 270.8  | 269.1 | 236.0  |
|        | 161.7                          | 137.3  | 136.4 | 118.4  | 141.0 | 169.7  | 129.0 | 118.8  | 112.7 | 139.1  |        | 256.7                          | 239.4  | 250.9 | 222.6  | 327.1 | 206.3  | 296.9 | 325.1  | 281.1 | 293.7  |
|        | 156.8                          | 160.7  | 160.2 | 179.3  | 152.5 | 148.6  | 144.6 | 158.5  | 156.6 | 148.3  |        | 309.0                          | 215.7  | 293.5 | 355.6  | 281.8 | 273.3  | 210.1 | 277.4  | 222.1 | 258.2  |
|        | LIN                            | LIN    | GEN   | GEN    | AMP   | AMP    | ERI   | ERI    | RIF   | RIF    |        | LIN                            | LIN    | GEN   | GEN    | AMP   | AMP    | ERI   | ERI    | RIF   | RIF    |
|        | MIC                            | subMIC | MIC   | subMIC | MIC   | subMIC | MIC   | subMIC | MIC   | subMIC |        | MIC                            | subMIC | MIC   | subMIC | MIC   | subMIC | MIC   | subMIC | MIC   | subMIC |
| AA     | 153.6                          | 143.5  | 158.3 | 132.3  | 147.7 | 155.6  | 148.3 | 159.5  | 133.8 | 146.7  | AA     | 253.0                          | 247.7  | 247.6 | 271.7  | 321.1 | 247.6  | 269.0 | 280.7  | 282.6 | 265.7  |
| ST.DEV | 10.4                           | 12.1   | 15.7  | 36.3   | 5.8   | 13.0   | 15.0  | 37.6   | 20.3  | 5.1    | ST.DEV | 52.6                           | 28.3   | 33.4  | 60.4   | 57.3  | 32.3   | 47.4  | 31.9   | 56.4  | 24.5   |
|        |                                |        |       |        |       |        |       |        |       |        |        |                                |        |       |        |       |        |       |        |       |        |
|        | ANTIBIOTICS and PB4 0.2 uM 24H |        |       |        |       |        |       |        |       |        |        | ANTIBIOTICS and PB4 0.2 uM 48H |        |       |        |       |        |       |        |       |        |
|        | UNTREATED                      |        |       |        |       |        |       |        |       |        |        | UNTREATED                      |        |       |        |       |        |       |        |       |        |
|        | 142.5                          | 174.3  | 161.0 | 150.2  | 135.6 | 164.1  | 145.1 | 153.7  | 155.6 | 162.7  |        | 225.2                          | 198.3  | 212.4 | 180.0  | 253.0 | 191.0  | 193.3 | 218.2  | 174.4 | 170.0  |
|        | 130.0                          | 177.0  | 222.3 | 140.1  | 153.7 | 138.5  | 176.5 | 170.2  | 150.5 | 151.0  |        | 264.2                          | 177.0  | 186.8 | 146.4  | 186.6 | 178.7  | 140.3 | 192.1  | 197.8 | 157.5  |
|        | 130.6                          | 193.9  | 149.5 | 175.4  | 146.9 | 162.2  | 170.2 | 189.2  | 132.2 | 160.3  |        | 172.0                          | 162.9  | 223.5 | 191.4  | 153.7 | 226.5  | 180.5 | 204.5  | 160.7 | 199.4  |
|        | 141.7                          | 151.9  | 122.0 | 123.9  | 149.7 | 138.3  | 161.5 | 166.1  | 146.6 | 133.7  |        | 199.2                          | 214.5  | 204.1 | 144.2  | 139.0 | 214.5  | 142.2 | 150.8  | 164.4 | 159.7  |



|        |       |        |       |        |       |        |       |        |       |        |        |       |        |       |        |       |        |       |        |       |        |
|--------|-------|--------|-------|--------|-------|--------|-------|--------|-------|--------|--------|-------|--------|-------|--------|-------|--------|-------|--------|-------|--------|
| AA     | 155.0 |        |       |        |       |        |       |        |       |        | AA     | 186.3 |        |       |        |       |        |       |        |       |        |
| ST.DEV | 20.2  |        |       |        |       |        |       |        |       |        | ST.DEV | 30.3  |        |       |        |       |        |       |        |       |        |
|        | LIN   | LIN    | GEN   | GEN    | AMP   | AMP    | ERI   | ERI    | RIF   | RIF    |        | LIN   | LIN    | GEN   | GEN    | AMP   | AMP    | ERI   | ERI    | RIF   | RIF    |
|        | MIC   | subMIC |        | MIC   | subMIC |
|        | 149.0 | 118.9  | 131.8 | 129.6  | 144.9 | 154.7  | 129.8 | 140.1  | 100.3 | 136.1  |        | 157.3 | 150.7  |       |        | 146.9 | 138.5  |       | 134.4  | 134.7 | 160.5  |
|        | 130.6 | 143.2  | 110.1 | 126.4  | 149.3 | 119.1  | 130.0 | 123.0  | 140.1 | 131.0  |        | 143.0 | 120.1  | 164.8 | 91.8   | 152.0 | 130.8  | 105.9 | 178.2  | 164.9 | 193.8  |
|        | 144.6 | 119.3  | 129.0 | 115.4  | 111.1 | 136.1  | 133.5 | 114.4  | 128.3 | 134.0  |        | 145.2 | 136.8  | 123.7 | 91.3   | 99.9  | 152.2  | 121.8 | 179.2  | 177.1 | 139.3  |
|        | 151.9 | 146.9  | 131.5 | 158.5  | 130.1 | 132.5  | 141.2 | 122.2  | 139.0 | 121.7  |        | 137.3 | 114.9  | 134.9 | 114.7  | 112.2 | 126.7  | 124.7 | 131.7  |       | 161.5  |
|        | LIN   | LIN    | GEN   | GEN    | AMP   | AMP    | ERI   | ERI    | RIF   | RIF    |        | LIN   | LIN    | GEN   | GEN    | AMP   | AMP    | ERI   | ERI    | RIF   | RIF    |
|        | MIC   | subMIC |        | MIC   | subMIC |
| AA     | 144.0 | 132.1  | 125.6 | 132.5  | 133.9 | 135.6  | 133.6 | 124.9  | 126.9 | 130.7  | AA     | 145.7 | 130.6  | 141.1 | 99.3   | 127.8 | 137.1  | 117.5 | 155.8  | 158.9 | 163.8  |
| ST.DEV | 9.4   | 15.1   | 10.4  | 18.4   | 17.2  | 14.7   | 5.3   | 10.9   | 18.5  | 6.4    | ST.DEV | 8.4   | 16.3   | 21.2  | 13.4   | 25.7  | 11.2   | 10.1  | 26.4   | 21.8  | 22.5   |
